# Supplementary material for: Cloning and Characterization of Aedes aegypti Trypsin Modulating Oostatic Factor (TMOF) Gut Receptor
Source: MDPI journal article supplement (doi:10.3390/biom11070934), 2021-06-23
Supplement: s1 [file s1]

## Supplementary material

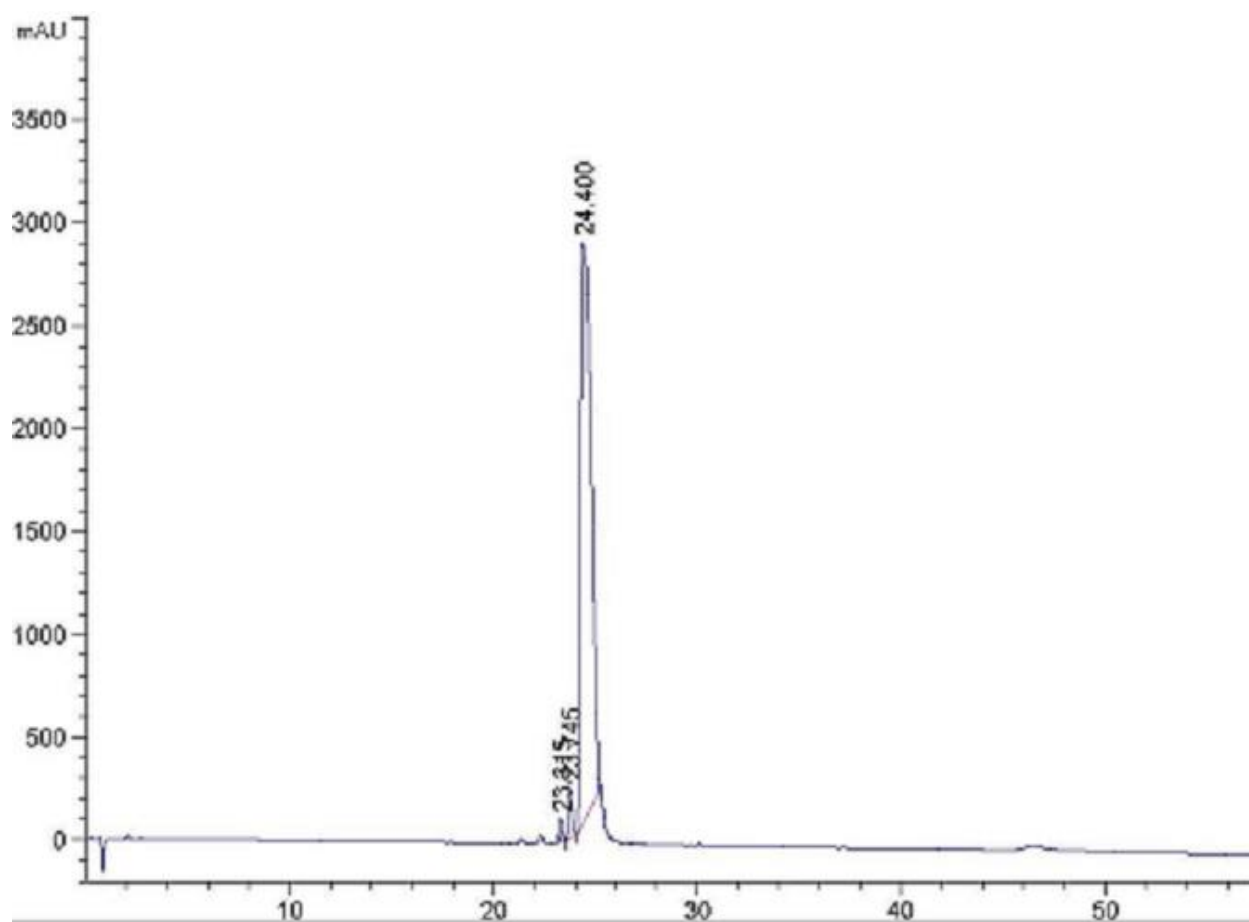

**S1.** Purification of TMOF-FITC by HPLC

# Spectrum Deconvolution

Data File D:\Data\TD20190829A\td 2019-08-29 10-32-00\012-P1-A2-Brovosky-Pure.D

Sample Name: Brovosky-Pure

## Deconvolution of Spectrum # 1 @ 24.489 min

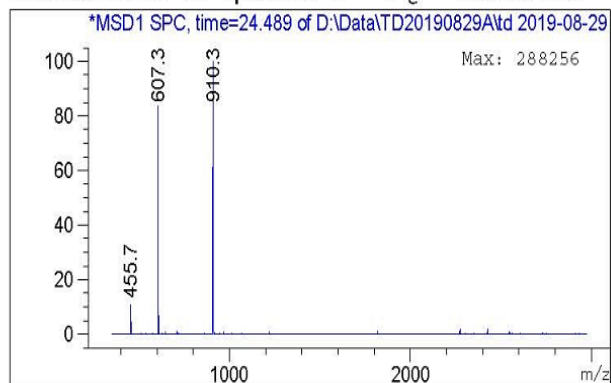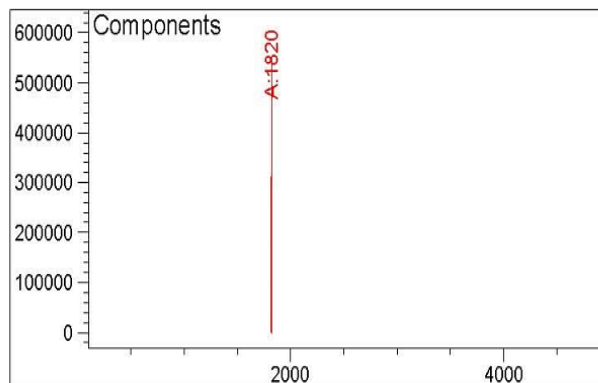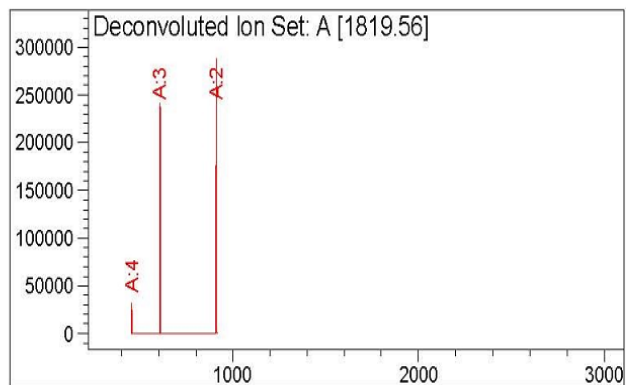

| Component | Molecular Weight | Absolute Abundance | Relative Abundance |
|-----------|------------------|--------------------|--------------------|
| A         | 1819.56          | 550224             | 100.00             |

\*\*\* End of Report \*\*\*

**S2.** Mass spectrometry of purified TMOF-FITC after HPLC purification, note the distinct expected ions at 455.7, 607.3 and 910.3.

901IMLESWYTESSGLKEKQSLESAIKLAVEAISNIRTVASLGQEPYVLERYYYKEIAKVD  
ACKKKSRLRGVVFALGQIMPFGYGLALFYGGKLVSEAELEYKDVIKVSEALIFGAWMLG  
ALAYAPNVNSAMLSAGRLMKLLDRTPKMHNPPSSSYLSTFENHEGNIKFTDVEFRYPTRPT  
PILQGLNLDIKKGNTVALVGPSGCGKSTCIQLLLRYYPDNGKVDIDGITTTDFQLGRIR  
QMGLVSQEPVLFDRITIAENIAYGDNTREISMPEIIEASKMANIHEFTIVNLPKGYDTSLGT  
GAQLSGGQKQRIAIARALVRNPRILLDEATSALDNQSEKIVQNALDHARKGRTCIIIAH  
LTTIQNADLICVIQSGVVVECGTHDELMAQNKIYAKLYAMQQVA1304

**S3.** *AeaABC*-TMOF receptor sequence of the 45 kDa SDS PAGE stained band (Figure 1B) corresponding to the C-terminal end of the *AeaABC*-TMOF receptor sequence (Figure 3) is highlighted in yellow. The sequence highlighted in cyan corresponds to the  $\alpha$  helical sequence involved in the binding of TMOF to its receptor (Figure 8 A,B). The sequence highlighted in red corresponds to MS/MS identified peptide. The ATP binding domain at the C-terminal of the receptor is underlined.

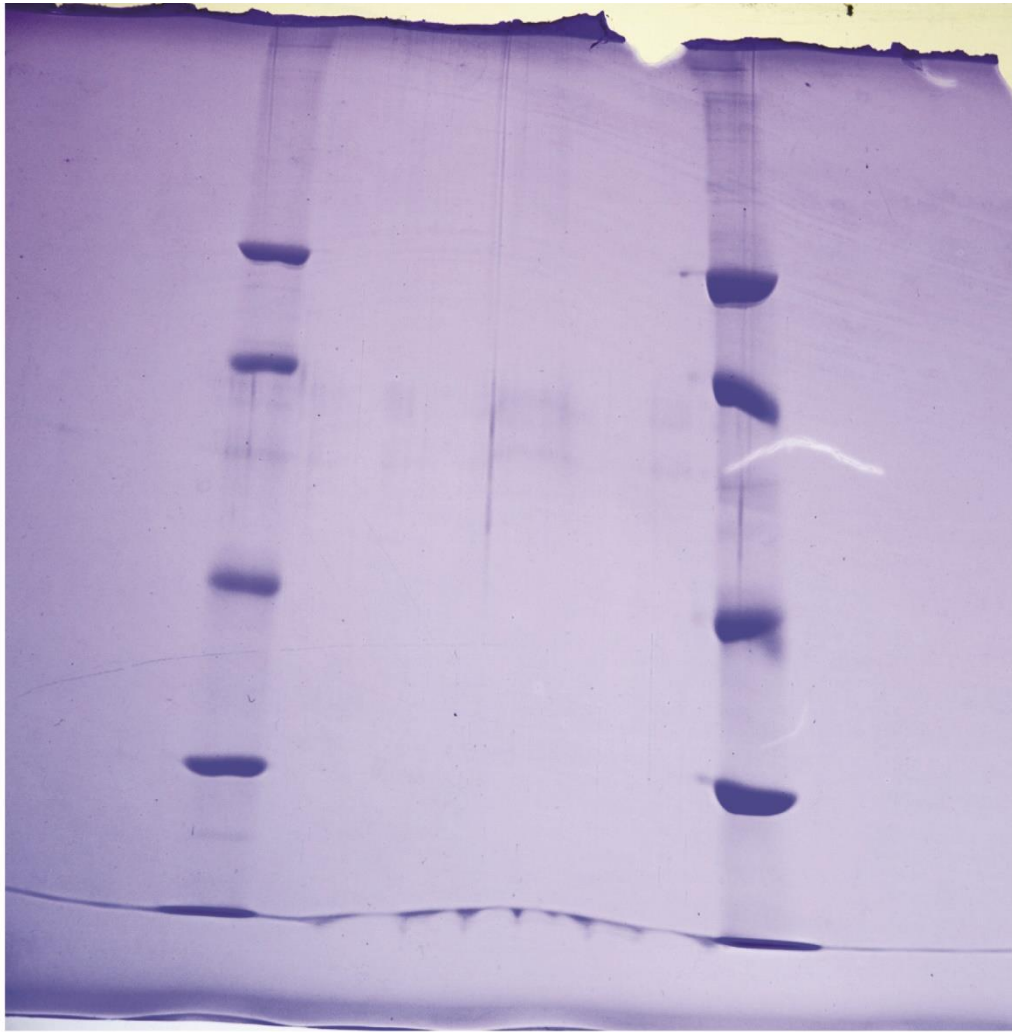

Original SDS PAGE that part was used for Figure 1B.
